# Supplementary material for: Deep eutectic solvent-assisted synthesis of La–Ce hybrid nanorods for the colorimetric determination of tetracycline in foods
Source: Royal Society of Chemistry journal article supplement (doi:10.1039/d4ay00412d), 2024-01-01
Supplement: d4ay00412d1.pdf [file d4ay00412d1.pdf]

**Supporting information for**

**Deep eutectic solvents-assisted synthesis of La-Ce hybrid nanorods for the  
colorimetric determination of tetracycline in foods**

Kaigang An<sup>a,b</sup>, Xin Li<sup>b</sup>, Jia Chen<sup>b,\*</sup>, Shuang Zhang<sup>b</sup>, Jing Xiao<sup>b</sup>, Qing Wang<sup>a</sup>, Hongdeng Qiu<sup>a,b,\*</sup>

<sup>a</sup> College of Chemistry and Chemical Engineering, Xinjiang Normal University, Urumqi 830000, China

<sup>b</sup> CAS Key Laboratory of Chemistry of Northwestern Plant Resources and Key Laboratory for Natural Medicine of Gansu Province, Lanzhou Institute of Chemical Physics, Chinese Academy of Sciences, Lanzhou 730000, China.

\* Corresponding E-mail: [jiachen@licp.cas.cn](mailto:jiachen@licp.cas.cn) (J. Chen); [hdqiu@licp.cas.cn](mailto:hdqiu@licp.cas.cn) (H. Qiu)

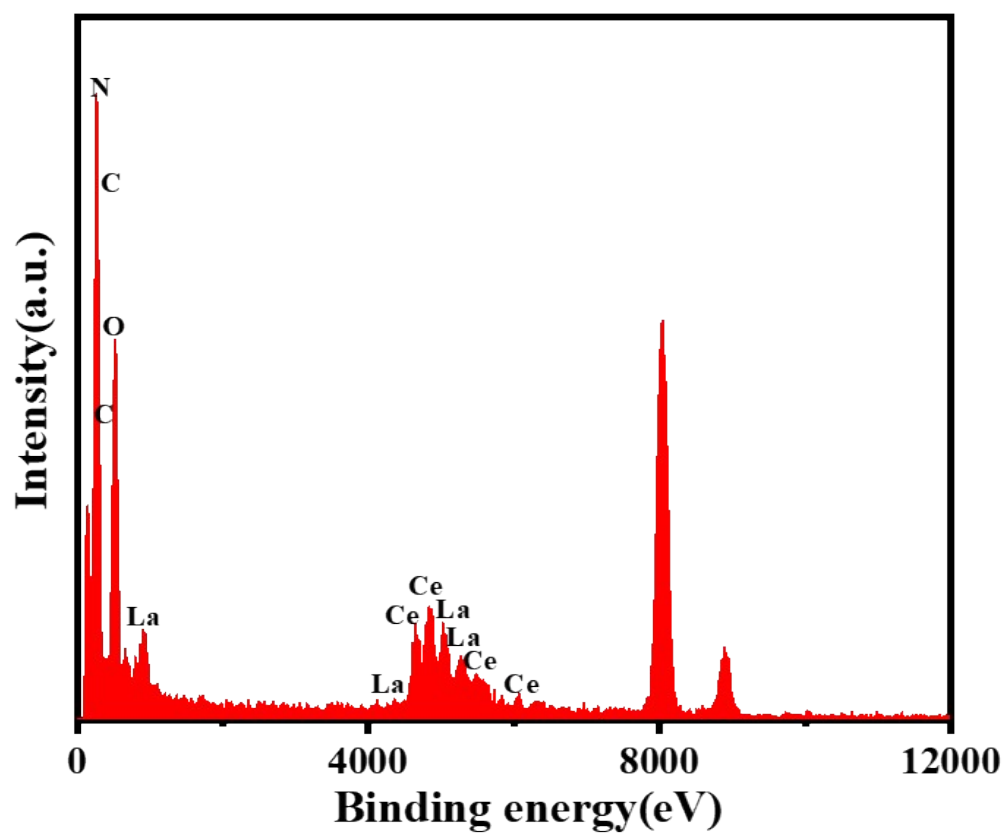

Fig. S1. EDX spectra of the La-Ce Nanorods.

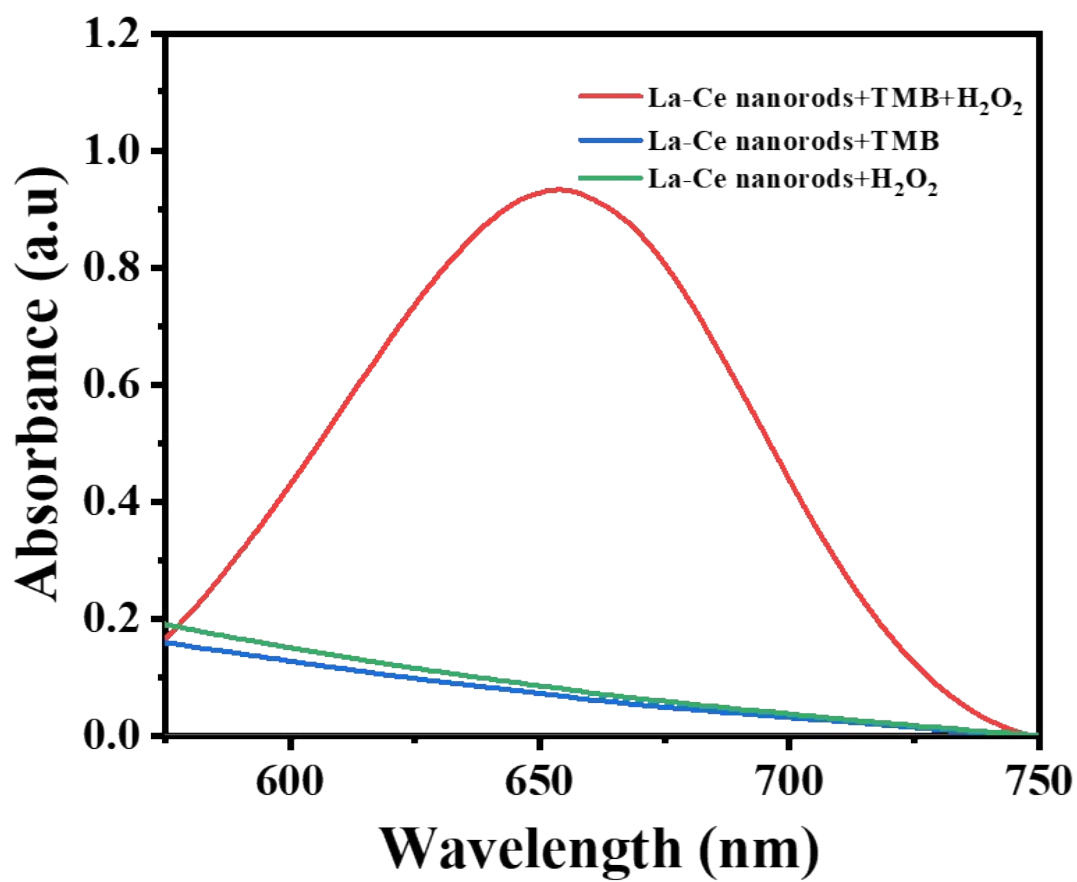

Fig. S2. UV-Vis spectra of La-Ce nanorods in different reaction solution.

**Table S1.** Comparison of the kinetic parameters of the peroxidase-like enzymes of La-Ce Nanorods with other nanoenzymes.

| Materials                           | Digestive substance           | $K_m$ (mM) | $V_{max}$ ( $\mu\text{M}\cdot\text{s}^{-1}$ ) | References |
|-------------------------------------|-------------------------------|------------|-----------------------------------------------|------------|
| HRP                                 | TMB                           | 0.434      | 0.1                                           | 1          |
|                                     | H <sub>2</sub> O <sub>2</sub> | 3.7        | 0.087                                         |            |
| AuNCs-Apt                           | TMB                           | 0.325      | 13.618                                        | 2          |
|                                     | H <sub>2</sub> O <sub>2</sub> | 3.664      | 30.991                                        |            |
| CeO <sub>2</sub>                    | TMB                           | 1.5        | 69                                            | 3          |
|                                     | H <sub>2</sub> O <sub>2</sub> | /          | /                                             |            |
| Ce/ZnCo <sub>2</sub> O <sub>4</sub> | TMB                           | 0.0886     | 18.796                                        | 4          |
|                                     | H <sub>2</sub> O <sub>2</sub> | 0.553      | 26.18                                         |            |
| LaCoO <sub>3</sub>                  | TMB                           | 0.24       | 36.9                                          | 5          |
|                                     | H <sub>2</sub> O <sub>2</sub> | 15         | 35                                            |            |
| La-Ce nanorod                       | TMB                           | 0.723      | 0.206                                         | This work  |
|                                     | H <sub>2</sub> O <sub>2</sub> | 0.727      | 0.0282                                        |            |

**Table S2.** Comparison of analytical performance of different methods for the determination of La-Ce Nanorods.

| Material                                   | Linearity range ( $\mu\text{M}$ ) | LOD ( $\mu\text{M}$ ) | Type of enzyme-like activity                                                            | Methods                                             | References |
|--------------------------------------------|-----------------------------------|-----------------------|-----------------------------------------------------------------------------------------|-----------------------------------------------------|------------|
| Eu-based MOF                               | 0.05-60                           | 0.003                 | Peroxidase-like enzyme                                                                  | Fluorescence method                                 | 6          |
| Fe@Co-N-SPC and DNAzyme                    | 0.0022-9                          | 0.75                  | Peroxidase-like enzyme                                                                  | Colorimetric method                                 | 7          |
| Ru@V <sub>2</sub> O <sub>4</sub> nanowires | 1-500                             | 0.778                 | Oxidase-like enzyme; Peroxidase-like enzyme; Catalase-like enzyme; Superoxide dismutase | Colorimetric method                                 | 8          |
| Pt/CeO <sub>2</sub>                        | 0.5-30                            | 0.080                 | Oxidase-like enzyme                                                                     | Colorimetric method                                 | 3          |
| Mn@Co <sub>3</sub> O <sub>4</sub> NSs      | 1.0-8.0                           | 0.40                  | Peroxidase-like enzyme                                                                  | Colorimetric method                                 | 9          |
| Co-CQDs                                    | 10-400                            | 0.27                  | Peroxidase-like enzyme                                                                  | Fluorescence colorimetric dual determination method | 10         |
| DNAzyme                                    | 0.0105-1                          | 3.2                   | Peroxidase-like enzyme                                                                  | Fluorescence colorimetric dual determination method | 11         |
| Ta <sub>2</sub> O <sub>5</sub> -Asp-GQD-Pt | 1-5000                            | 0.41                  | Catalase-like enzyme                                                                    | Electrochemical method                              | 12         |
| La-Ce nanorods                             | 0.05-10                           | 0.016                 | Peroxidase-like enzyme                                                                  | Colorimetric method                                 | This work  |

**Table S3.** Determination and recovery test of TC in milk, honey and pork.

| Materials | Spiked concentration ( $\mu\text{M}$ ) | Determination concentration ( $\mu\text{M}$ ) | Recovery (%) | RSD (%)<br>n=3 | National food safety standard |
|-----------|----------------------------------------|-----------------------------------------------|--------------|----------------|-------------------------------|
| Milk      | 0                                      | 0.042                                         | 0            |                |                               |
|           | 0.5                                    | 0.554                                         | 102          | 0.99           | 0.521                         |
| Honey     | 0                                      | 0.069                                         | 0            |                |                               |
|           | 0.5                                    | 0.518                                         | 91.4         | 4.16           | 0.489                         |
| Pork      | 0                                      | 0.070                                         | 0            |                |                               |
|           | 0.5                                    | 0.514                                         | 93.2         | 7.3            | 0.506                         |

## References

- [1] N. C. Veitch, Horseradish peroxidase: a modern view of a classic enzyme. *Phytochemistry*, 2004, **6**, 249-59.
- [2] Z. Zhang, Y. Tian, P. Huang and F. Y. Wu, Using target-specific aptamers to enhance the peroxidase-like activity of gold nanoclusters for colorimetric detection of tetracycline antibiotics. *Talanta*, 2020, **208**, 120342.
- [3] H. Song, H. Wang, X. Li, Y. Peng, J. Pan and X. Niu, Sensitive and selective colorimetric detection of alkaline phosphatase activity based on phosphate anion-quenched oxidase-mimicking activity of Ce(IV) ions. *Anal. Chim. Acta*, 2018, **1044**, 154-161.
- [4] D. Yin, H. Yang, S. Wang, Z. Yang, Q. Liu, X. Zhang and X. Zhang, Ce-doped ZnCo<sub>2</sub>O<sub>4</sub> nanospheres: Synthesis, double enzyme-like performances, catalytic mechanism and fast colorimetric determination for glutathione. *Colloid Surface A*, 2020, **607**, 125466.
- [5] K. Wang, J. Song, X. Duan, J. Mu and Y. Wang, Perovskite LaCoO<sub>3</sub> nanoparticles as enzyme mimetics: their catalytic properties, mechanism and application in dopamine biosensing. *New. J Chem.*, 2017, **41**, 8554-8560.
- [6] L. Jia, R. Chen, J. Xu, L. Zhang, X. Chen, N. Bi, J. Gou and T. Zhao, A stick-like intelligent multicolor nano-sensor for the detection of tetracycline: The integration of nano-clay and carbon dots. *J. Hazard. Mater.*, 2021, **413**, 125296.
- [7] D. Xu, Z. Shen, G. Wang, L. Wei, X. Gao, H. Dong, G. Wang, X. Sun, F. Li and Y. Guo, Dual-catalytic colorimetric biosensor based on double-active Fe@Co-N stellate porous carbon and DNAzyme for simultaneous detection of tetracycline antibiotics. *Sensor. Actuat. B Chem.*, 2023, **376**, 133024.
- [8] J. Hou, P. Jia, K. Yang, T. Bu, X. Sun and L. Wang, Facile preparation of Ru@V<sub>2</sub>O<sub>4</sub> nanowires exhibiting excellent tetra-enzyme mimetic activities for sensitive colorimetric H<sub>2</sub>O<sub>2</sub> and cysteine sensing. *Sensor. Actuat B Chem.*, 2021, **344**, 130266.
- [9] J. Zheng, D. Song, H. Chen, J. Xu, N. S. Alharbi, T. Hayat and M. Zhang, Enhanced peroxidase-like activity of hierarchical MoS<sub>2</sub>-decorated N-doped carbon nanotubes with synergetic effect for colorimetric detection of H<sub>2</sub>O<sub>2</sub> and ascorbic acid. *Chin. Chem. Lett.*, 2020, **31**, 1109-1113.
- [10] C. Li, J. Zeng, D. Guo, L. Liu, L. Xiong, X. Luo, Z. Hu and F. Wu, Cobalt-Doped Carbon Quantum Dots with Peroxidase-Mimetic Activity for Ascorbic Acid Detection through Both

Fluorometric and Colorimetric Methods. *ACS Appl. Mater. Interfaces*, 2021, **13**, 49453-49461.

[11]Y. Tang, X. Huang, X. Wang, C. Wang, H. Tao and Y. Wu, G-quadruplex DNAzyme as peroxidase mimetic in a colorimetric biosensor for ultrasensitive and selective detection of trace tetracyclines in foods. *Food Chem.*, 2022, **366**, 130560.

[12]L. Nana, L. Ruiyi, W. Guangli and L. Zaijun, Electrochemical detection of uric acid in human serum based on ultrasmall Ta<sub>2</sub>O<sub>5</sub> nanoparticle anchored Pt atom with ultrahigh uricase and catalase activities. *Microchim. Acta*, 2023, **19**, 195.
